# Supplementary material for: Somatic Mutations Reveal Lineage Relationships and Age-Related Mutagenesis in Human Hematopoiesis
Source: PubMed Central journal article supplement — Cell Rep. 2018 Nov 27;25(9):2308–2316.e4. doi: 10.1016/j.celrep.2018.11.014 (PMC6289083; doi:10.1016/j.celrep.2018.11.014), 2018-11-27
Supplement: mmc1.pdf [file mmc1.pdf]

**Cell Reports, Volume 25**

**Supplemental Information**

**Somatic Mutations Reveal Lineage Relationships  
and Age-Related Mutagenesis in Human Hematopoiesis**

**Fernando G. Osorio, Axel Rosendahl Huber, Rurika Oka, Mark Verheul, Sachin H. Patel, Karlijn Hasaart, Lisanne de la Fonteyne, Ignacio Varela, Fernando D. Camargo, and Ruben van Boxtel**

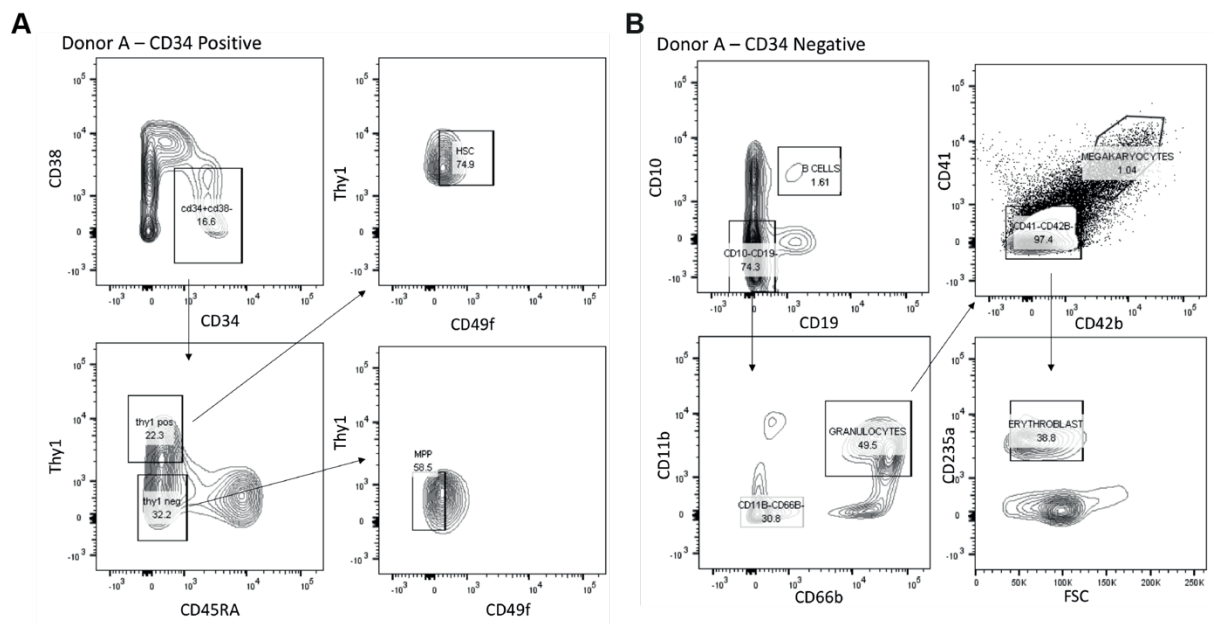

**Figure S1. HSC and MPP isolation strategy by FACS. Related to Figure 1A.**

**(A)** Representative FACS plot for purifying HSCs and MPPs, starting with a CD34+ enriched bone marrow-derived cell suspension.

**(B)** Representative FACS plot for isolation of pre-B-cells, granulocytes, megakaryocyte progenitors and erythroblasts.

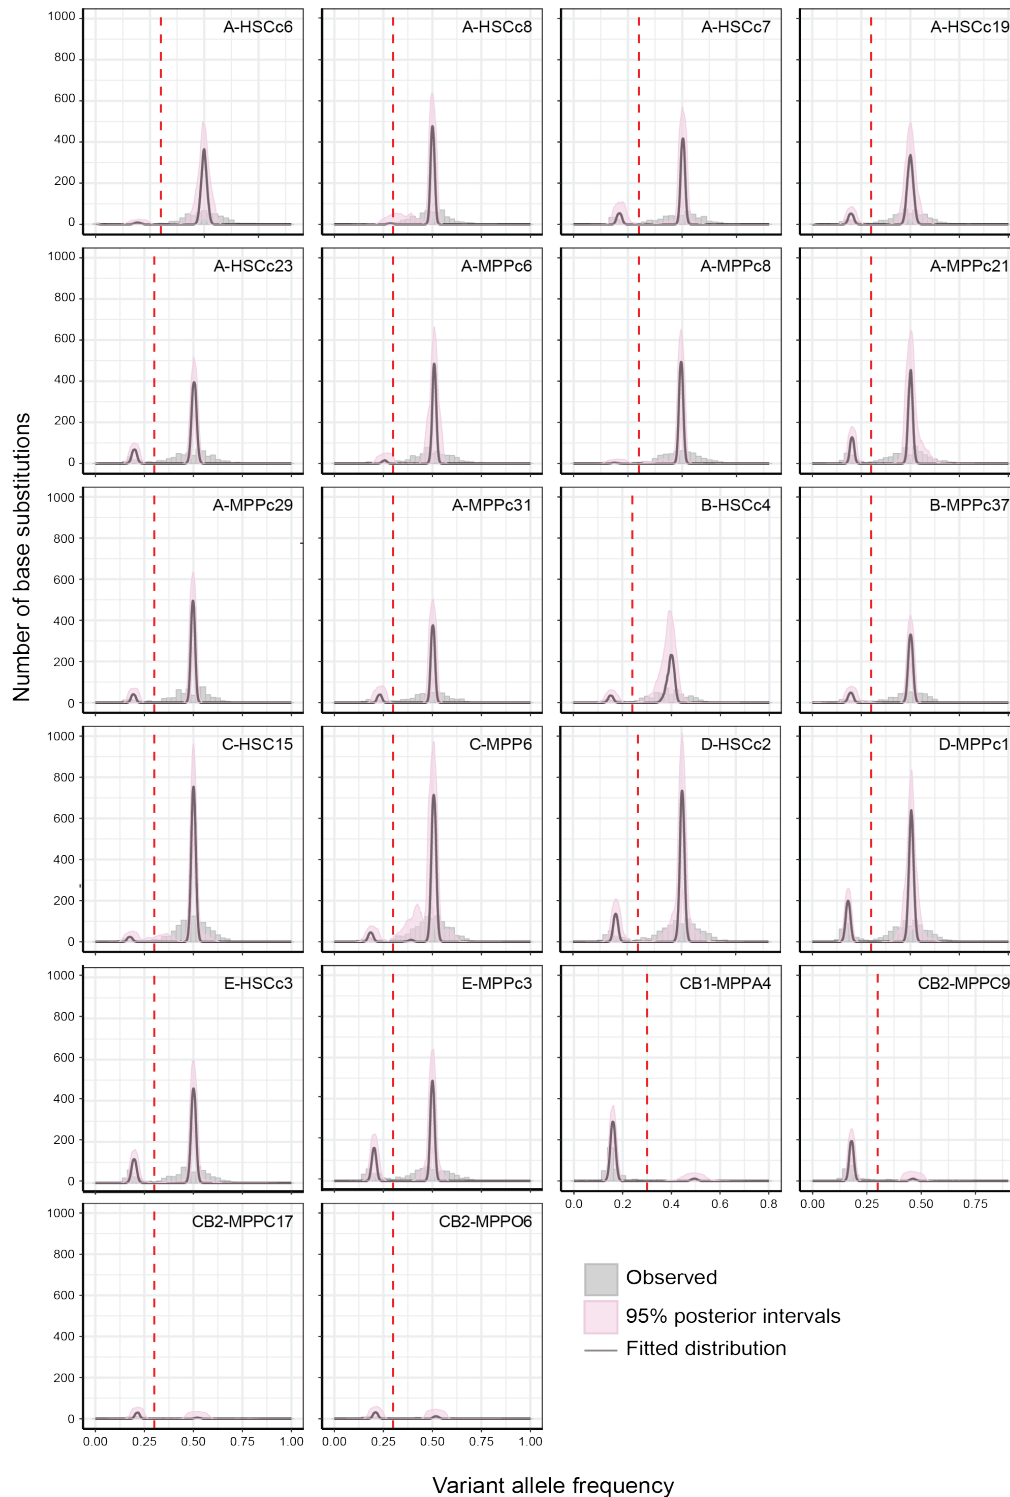

**Figure S2. Variant allele fractions (VAF) of base substitutions in sequenced clones. Related to STAR methods section ‘ Mutation calling and filtering’.**

Histograms of the variant allele frequency of all detected single base substitutions before the last filtering step (VAF > 0.3). Clonal heterozygous mutations peak at VAF = 0.5. A threshold of VAF 0.3 was used to obtain mutations that were clonal in the organoid culture and thus present in the original sorted HSPC. Mutations acquired during or after clonal culture have lower VAFs and are therefore excluded. Dirichlet modeling was used to determine the clonality of each culture, and a peak at VAF = 0.5 indicates mutations acquired during life. Shaded area represents the 95% posterior confidence intervals for the fitted distribution. (pink area). In most samples, two clusters of mutations can be identified.



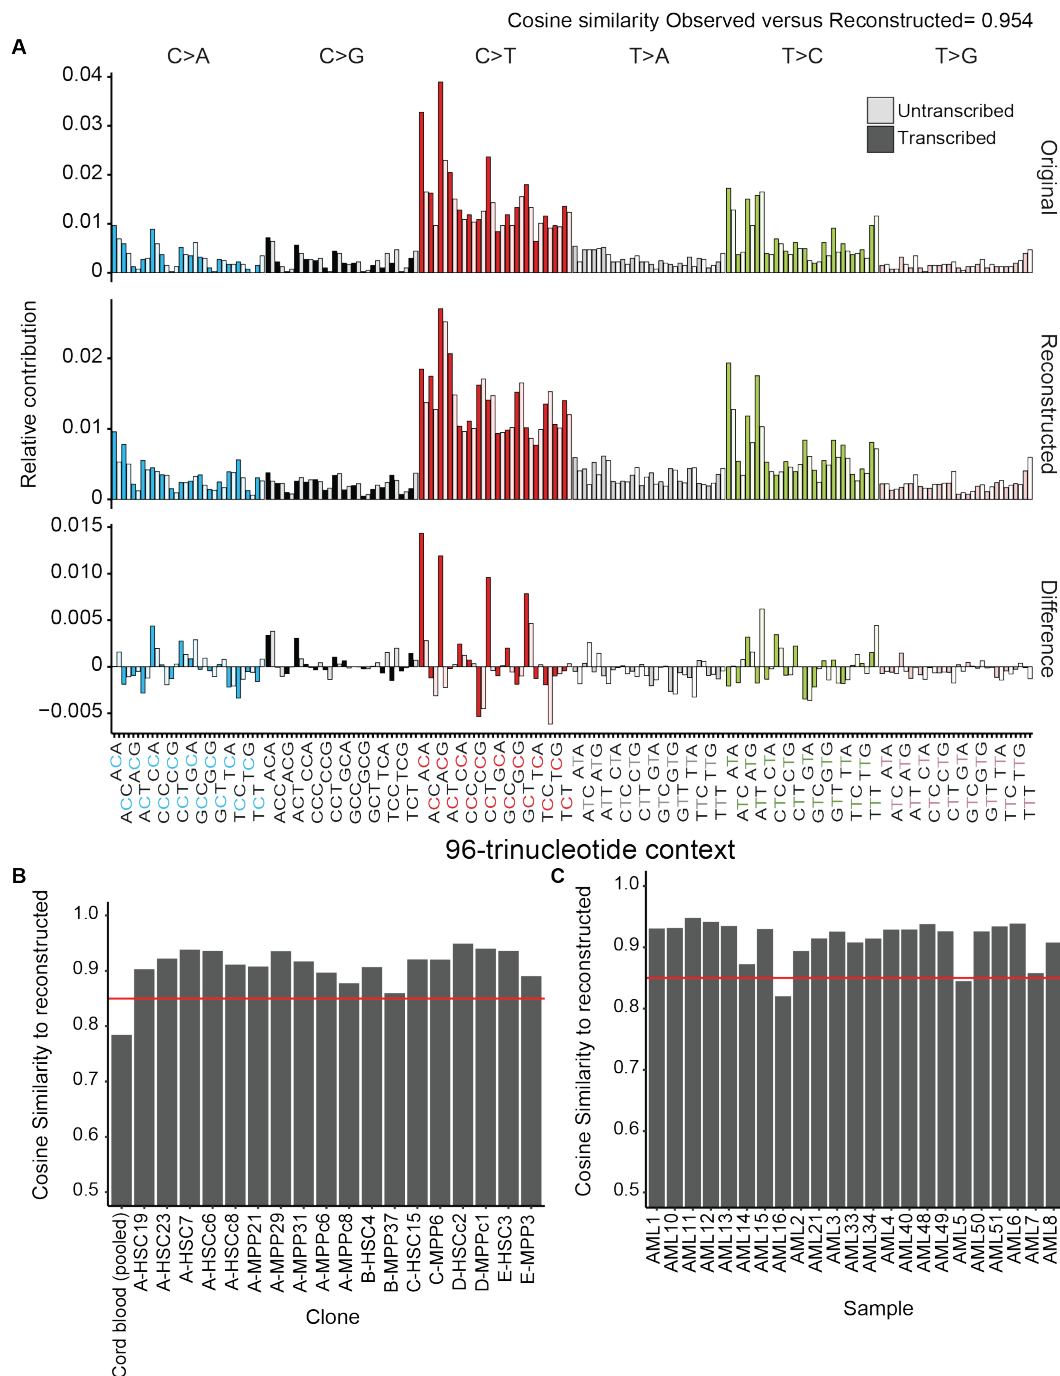

**Figure S4. Absolute and transcriptional strand mutational profiles and cosine similarity of HSPC and AML mutation profiles to reconstructed profiles. Related to Figure 3D-E.**

(A) Upper graph depicts transcriptional strand bias profiles from HSPCs (pooled) compared with the reconstructed 192-nucleotide matrix using transcriptional-strand signatures. (middle graph). Lower graph depicts relative difference between observed and expected profiles. Cosine similarity between observed and reconstructed mutational profiles indicated above figure.

(B) Cosine similarity of HSPC and cord blood mutation profiles to their respective reconstructed mutation profiles with Signature 1, 5 and 32. All four cord blood samples were pooled, as mutation load in these samples was low.

(C) Cosine similarity of AML mutation profiles to their respective reconstructed mutation profiles with Signature 1, 5 and 32.

**Table S1. Overview of sample and donor information. Related to Figure 2.**

| HPSC       | Donor | Age<br>(years) | Gender | Cell<br>type | Surveyed genome<br>(%)* | No. base<br>substitutions† | No. of unique base<br>substitutions‡ |
|------------|-------|----------------|--------|--------------|-------------------------|----------------------------|--------------------------------------|
| A-HSCc6    | A     | 33             | Male   | HSC          | 96.6                    | 499                        | 498                                  |
| A-HSCc8    | A     | 33             | Male   | HSC          | 96.7                    | 543                        | 542                                  |
| A-HSCc7    | A     | 33             | Male   | HSC          | 90.8                    | 464                        | 462                                  |
| A-HSCc19   | A     | 33             | Male   | HSC          | 96.1                    | 554                        | 553                                  |
| A-HSCc23   | A     | 33             | Male   | HSC          | 95.4                    | 527                        | 527                                  |
| A-MPPc6    | A     | 33             | Male   | MPP          | 96.1                    | 536                        | 534                                  |
| A-MPPc8    | A     | 33             | Male   | MPP          | 96.8                    | 505                        | 505                                  |
| A-MPPc21   | A     | 33             | Male   | MPP          | 96.1                    | 592                        | 592                                  |
| A-MPPc29   | A     | 33             | Male   | MPP          | 96.1                    | 548                        | 545                                  |
| A-MPPc31   | A     | 33             | Male   | MPP          | 95.3                    | 433                        | 432                                  |
| B-HSCc4    | B     | 26             | Male   | HSC          | 96.4                    | 504                        | 502                                  |
| B-MPPCc37  | B     | 26             | Male   | MPP          | 96.8                    | 423                        | 421                                  |
| C-HSCc15   | C     | 55             | Female | HSC          | 96.5                    | 910                        | 906                                  |
| C-MPPc6    | C     | 55             | Female | MPP          | 96.4                    | 1018                       | 1014                                 |
| D-HSCc2    | D     | 63             | Male   | HSC          | 92.4                    | 859                        | 859                                  |
| D-MPPc1    | D     | 63             | Male   | MPP          | 92.4                    | 818                        | 818                                  |
| E-HSC3     | E     | 41             | Female | HSC          | 92.8                    | 611                        | 611                                  |
| E-MPP3     | E     | 41             | Female | MPP          | 92.7                    | 580                        | 580                                  |
| CB1-MPPA4  | CB1   | 0              | Female | MPP          | 96.4                    | 37                         | -                                    |
| CB2-MPPC9  | CB2   | 0              | Male   | MPP          | 89.0                    | 44                         | 44                                   |
| CB2-MPPC17 | CB2   | 0              | Male   | MPP          | 94.1                    | 32                         | 32                                   |
| CB2-MPPO6  | CB2   | 0              | Male   | MPP          | 91.4                    | 45                         | 45                                   |

\* Percentage of the non-N autosomal genome with 20x coverage in both blood progenitor and reference sample.

† Number of somatic base substitutions detected within surveyed genome.

‡ Number of unique somatic base substitutions compared to other clones sequenced from donor.

**Table S2. Validation Rates of SNVs in HSPCs. Related to STAR methods section ‘smMIP analysis of SNVs’.**

| HSPC    | Number of Amplicon Loci* | Validated Amplicon Loci | Validation rate |
|---------|--------------------------|-------------------------|-----------------|
| AC63HSC | 54                       | 48                      | 0.888888889     |
| AC63MPP | 41                       | 37                      | 0.902439024     |
| BCHHSC  | 65                       | 61                      | 0.938461538     |

\* Amplicon Loci sequenced at least 20x depth.

**Table S3. Non-synonymous base substitutions in sequenced HSPCs. Related to Figure 2.**

HSPC clone, clone identifier (see Table S1), Chromosome of the variant, Position on the chromosome, Reference allele and mutated alternative allele, Mutation type of the variant, Gene in which variant is located, Amino acid change, allelic fraction of the variant.

**Table S4. Oligonucleotide sequences for amplicon sequencing of shared mutations and smMIP validation. Related to Figure 4 and Table S2.**

(A) Variants and primer pairs used to sequence additional HSPC clones and mature blood populations for shared mutations in HSPCs of donor A.

(B) Primer sequences used for smMIP validation of variants.
